# Supplementary material for: Impacts of Phosphogypsum, Soluble Fertilizer and Lime Amendment of Acid Soils on the Bioavailability of Phosphorus and Sulphur under Lucerne (Medicago sativa)
Source: MDPI journal article supplement (doi:10.3390/plants9070883), 2020-07-13
Supplement: s1 [file s1]

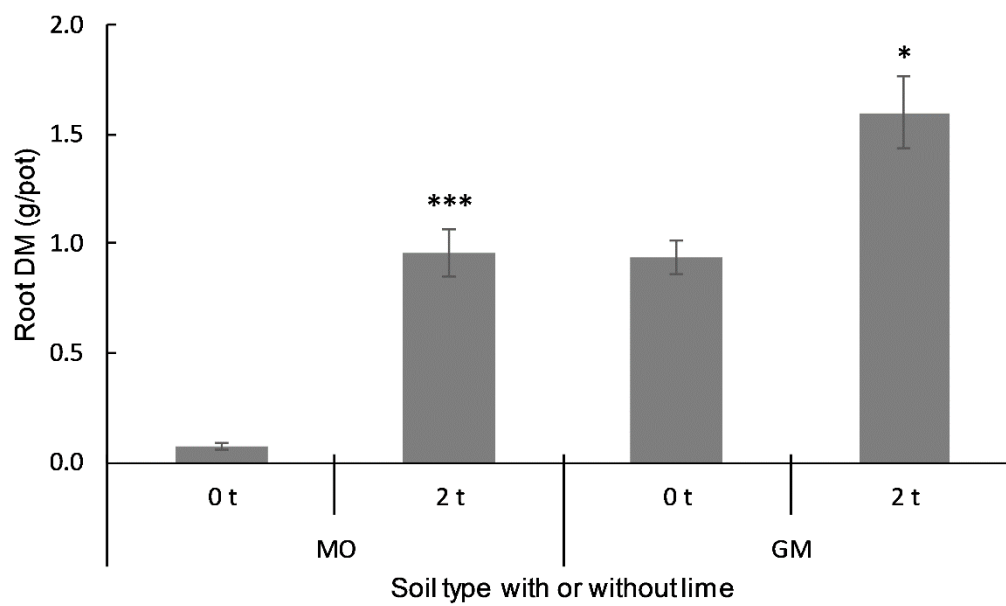

**Figure S1.** Lime addition effect on overall average root dry matter (DM) accumulated under each soil (MO and GM indicate Molesworth and Glenmore soils, respectively). Error bars are standard errors ( $\pm$  SE,  $n = 28$ ), Asterisks indicate the significance of two-sample t-test at 5% for liming ( $2 \text{ t ha}^{-1}$ ) effect compared to no lime conditions ( $0 \text{ t ha}^{-1}$ ) (\* $p < 0.05$ , \*\* $p < 0.01$ , \*\*\* $p < 0.001$ ).
